# Supplementary material for: Comparison of Severe Maternal Morbidities Associated With Delivery During Periods of Circulation of Specific SARS-CoV-2 Variants
Source: PubMed Central journal article supplement (PMC9375165; doi:10.1001/jamanetworkopen.2022.26436), 2022-08-12
Supplement: jamanetwopen-e2226436-s001.pdf [file jamanetwopen-e2226436-s001.pdf]

## Supplemental Online Content

Mupanomunda M, Fakih MG, Miller C, et al. Comparison of severe maternal morbidities associated with delivery during periods of circulation of specific SARS-CoV-2 variants. *JAMA Netw Open*. 2022;5(8):e2226436. doi:10.1001/jamanetworkopen.2022.26436

**eTable 1.** Population Characteristics in the Unmatched Population

**eFigure.** Standardized Mean Differences Between Groups With and Without SARS-CoV-2 Infection Before and After Propensity Matching

**eTable 2.** Distribution of Individual SMM, by Variant

**eTable 3.** Baseline Characteristics Comparing Populations With Documented SARS-CoV-2 Testing After Propensity Matching

**eTable 4.** Association of SARS-CoV-2 Infection With Any SMM, Nonrespiratory SMM, Respiratory SMM, and Nontransfusion SMM

This supplemental material has been provided by the authors to give readers additional information about their work.

# eTable 1. Population Characteristics in the Unmatched Population

| Characteristic                                       | Original SARS-CoV-2 Strain<br>(03/2020-12/2020) |                          |         | Alpha SARS-CoV-2 Variant<br>(01/2021-06/2021) |                          |         | Delta SARS-CoV-2 Variant (07/2021-<br>11/2021) |                          |         | Omicron SARS-CoV Variant<br>(12/2021-01/2022) |                          |         | Group Total                         |                            |         | Total             |
|------------------------------------------------------|-------------------------------------------------|--------------------------|---------|-----------------------------------------------|--------------------------|---------|------------------------------------------------|--------------------------|---------|-----------------------------------------------|--------------------------|---------|-------------------------------------|----------------------------|---------|-------------------|
|                                                      | Unknown/Test-Negative<br>N = 43,033             | Test-Positive<br>N = 978 | p-value | Unknown/Test-Negative<br>N = 25,168           | Test-Positive<br>N = 744 | p-value | Unknown/Test-Negative<br>N = 22,324            | Test-Positive<br>N = 681 | p-value | Unknown/Test-Negative<br>N = 7,800            | Test-Positive<br>N = 726 | p-value | Unknown/Test-Negative<br>N = 98,325 | Test-Positive<br>N = 3,129 | p-value | N = 101,454       |
| <b>Age</b>                                           | 29.6 (25.4, 33.6)                               | 29.5 (24.8, 33.5)        | 0.072   | 29.7 (25.5, 33.6)                             | 29.0 (24.4, 33.5)        | 0.015   | 29.9 (25.7, 33.8)                              | 29.1 (25.0, 33.1)        | 0.006   | 29.8 (25.4, 33.8)                             | 28.6 (24.5, 32.8)        | <0.001  | 29.7 (25.5, 33.7)                   | 29.1 (24.6, 33.2)          | <0.001  | 29.7 (25.4, 33.6) |
| <b>Race</b>                                          |                                                 |                          | <0.001  |                                               |                          | 0.005   |                                                |                          | 0.06    |                                               |                          | 0.2     |                                     |                            | <0.001  |                   |
| White                                                | 29,424 (68%)                                    | 618 (63%)                |         | 17,396 (69%)                                  | 499 (67%)                |         | 15,171 (68%)                                   | 460 (68%)                |         | 5,238 (67%)                                   | 467 (64%)                |         | 67,229 (68%)                        | 2,044 (65%)                |         | 69,273 (68%)      |
| Black or African American                            | 8,330 (19%)                                     | 209 (21%)                |         | 4,601 (18%)                                   | 155 (21%)                |         | 3,964 (18%)                                    | 142 (21%)                |         | 1,416 (18%)                                   | 154 (21%)                |         | 18,311 (19%)                        | 660 (21%)                  |         | 18,971 (19%)      |
| Other*                                               | 4,305 (10%)                                     | 111 (11%)                |         | 2,598 (10%)                                   | 62 (8.3%)                |         | 2,550 (11%)                                    | 66 (9.7%)                |         | 918 (12%)                                     | 84 (12%)                 |         | 10,371 (11%)                        | 323 (10%)                  |         | 10,694 (11%)      |
| Unknown/declined                                     | 974 (2.3%)                                      | 40 (4.1%)                |         | 573 (2.3%)                                    | 28 (3.8%)                |         | 639 (2.9%)                                     | 13 (1.9%)                |         | 228 (2.9%)                                    | 21 (2.9%)                |         | 2,414 (2.5%)                        | 102 (3.3%)                 |         | 2,516 (2.5%)      |
| <b>Ethnicity</b>                                     |                                                 |                          | <0.001  |                                               |                          | <0.001  |                                                |                          | 0.068   |                                               |                          | 0.1     |                                     |                            | <0.001  |                   |
| Hispanic or Latino                                   | 7,051 (16%)                                     | 323 (33%)                |         | 4,015 (16%)                                   | 156 (21%)                |         | 3,966 (18%)                                    | 140 (21%)                |         | 1,513 (19%)                                   | 160 (22%)                |         | 16,545 (17%)                        | 779 (25%)                  |         | 17,324 (17%)      |
| Not Hispanic or Latino/unknown                       | 35,982 (84%)                                    | 655 (67%)                |         | 21,153 (84%)                                  | 588 (79%)                |         | 18,358 (82%)                                   | 541 (79%)                |         | 6,287 (81%)                                   | 566 (78%)                |         | 81,780 (83%)                        | 2,350 (75%)                |         | 84,130 (83%)      |
| <b>Payor</b>                                         |                                                 |                          | <0.001  |                                               |                          | <0.001  |                                                |                          | 0.001   |                                               |                          | <0.001  |                                     |                            |         |                   |
| Private                                              | 24,759 (58%)                                    | 412 (42%)                |         | 14,890 (59%)                                  | 380 (51%)                |         | 13,016 (58%)                                   | 351 (52%)                |         | 4,454 (57%)                                   | 349 (48%)                |         | 57,119 (58%)                        | 1,492 (48%)                | <0.001  | 58,611 (58%)      |
| Public                                               | 17,512 (41%)                                    | 539 (55%)                |         | 9,934 (39%)                                   | 353 (47%)                |         | 8,914 (40%)                                    | 316 (46%)                |         | 3,193 (41%)                                   | 361 (50%)                |         | 39,553 (40%)                        | 1,569 (50%)                |         | 41,122 (41%)      |
| Uninsured/self pay                                   | 685 (1.6%)                                      | 26 (2.7%)                |         | 317 (1.3%)                                    | 11 (1.5%)                |         | 362 (1.6%)                                     | 11 (1.6%)                |         | 144 (1.8%)                                    | 15 (2.1%)                |         | 1,508 (1.5%)                        | 63 (2.0%)                  |         | 1,571 (1.5%)      |
| Other/unknown                                        | 77 (0.2%)                                       | 1 (0.1%)                 |         | 27 (0.1%)                                     | 0 (0%)                   |         | 32 (0.1%)                                      | 3 (0.4%)                 |         | 9 (0.1%)                                      | 1 (0.1%)                 |         | 145 (0.1%)                          | 5 (0.2%)                   |         | 150 (0.1%)        |
| <b>Obesity</b>                                       | 5,579 (13%)                                     | 158 (16%)                | 0.004   | 3,733 (15%)                                   | 131 (18%)                | 0.041   | 2,920 (13%)                                    | 91 (13%)                 | 0.9     | 888 (11%)                                     | 99 (14%)                 | 0.08    | 13,121 (13%)                        | 479 (15%)                  | 0.002   | 13,600 (13%)      |
| <b>Asthma</b>                                        | 2,397 (5.6%)                                    | 72 (7.4%)                | 0.019   | 1,512 (6.0%)                                  | 51 (6.9%)                | 0.4     | 1,332 (6.0%)                                   | 45 (6.6%)                | 0.5     | 483 (6.2%)                                    | 52 (7.2%)                | 0.3     | 5,724 (5.8%)                        | 220 (7.0%)                 | 0.005   | 5,944 (5.9%)      |
| <b>Diabetes</b>                                      | 4,388 (10%)                                     | 143 (15%)                | <0.001  | 2,633 (10%)                                   | 95 (13%)                 | 0.05    | 2,377 (11%)                                    | 71 (10%)                 | >0.9    | 823 (11%)                                     | 75 (10%)                 | >0.9    | 10,221 (10%)                        | 384 (12%)                  | <0.001  | 10,605 (10%)      |
| <b>Anemia</b>                                        | 3,777 (8.8%)                                    | 96 (9.8%)                | 0.3     | 2,306 (9.2%)                                  | 69 (9.3%)                | >0.9    | 2,279 (10%)                                    | 86 (13%)                 | 0.047   | 795 (10%)                                     | 94 (13%)                 | 0.024   | 9,157 (9.3%)                        | 345 (11%)                  | 0.001   | 9,502 (9.4%)      |
| <b>Preterm Delivery less than 37 weeks gestation</b> | 4,790 (11%)                                     | 137 (14%)                | 0.006   | 3,016 (12%)                                   | 106 (14%)                | 0.07    | 2,384 (11%)                                    | 138 (20%)                | <0.001  | 848 (11%)                                     | 109 (15%)                | <0.001  | 11,038 (11%)                        | 490 (16%)                  | <0.001  | 11,528 (11%)      |
| <b>Patients with Severe Maternal Morbidities</b>     | 690 (1.6%)                                      | 44 (4.5%)                | <0.001  | 431 (1.7%)                                    | 35 (4.7%)                | <0.001  | 343 (1.5%)                                     | 70 (10%)                 | <0.001  | 109 (1.4%)                                    | 21 (2.9%)                | 0.003   | 1,573 (1.6%)                        | 170 (5.4%)                 | <0.001  | 1,743 (1.7%)      |

Statistics presented: n (%); Median (IQR)

\*American Indian or Alaska Native, Asian, Hispanic

# eFigure. Standardized Mean Differences Between Groups With and Without SARS-CoV-2 Infection Before and After Propensity Matching

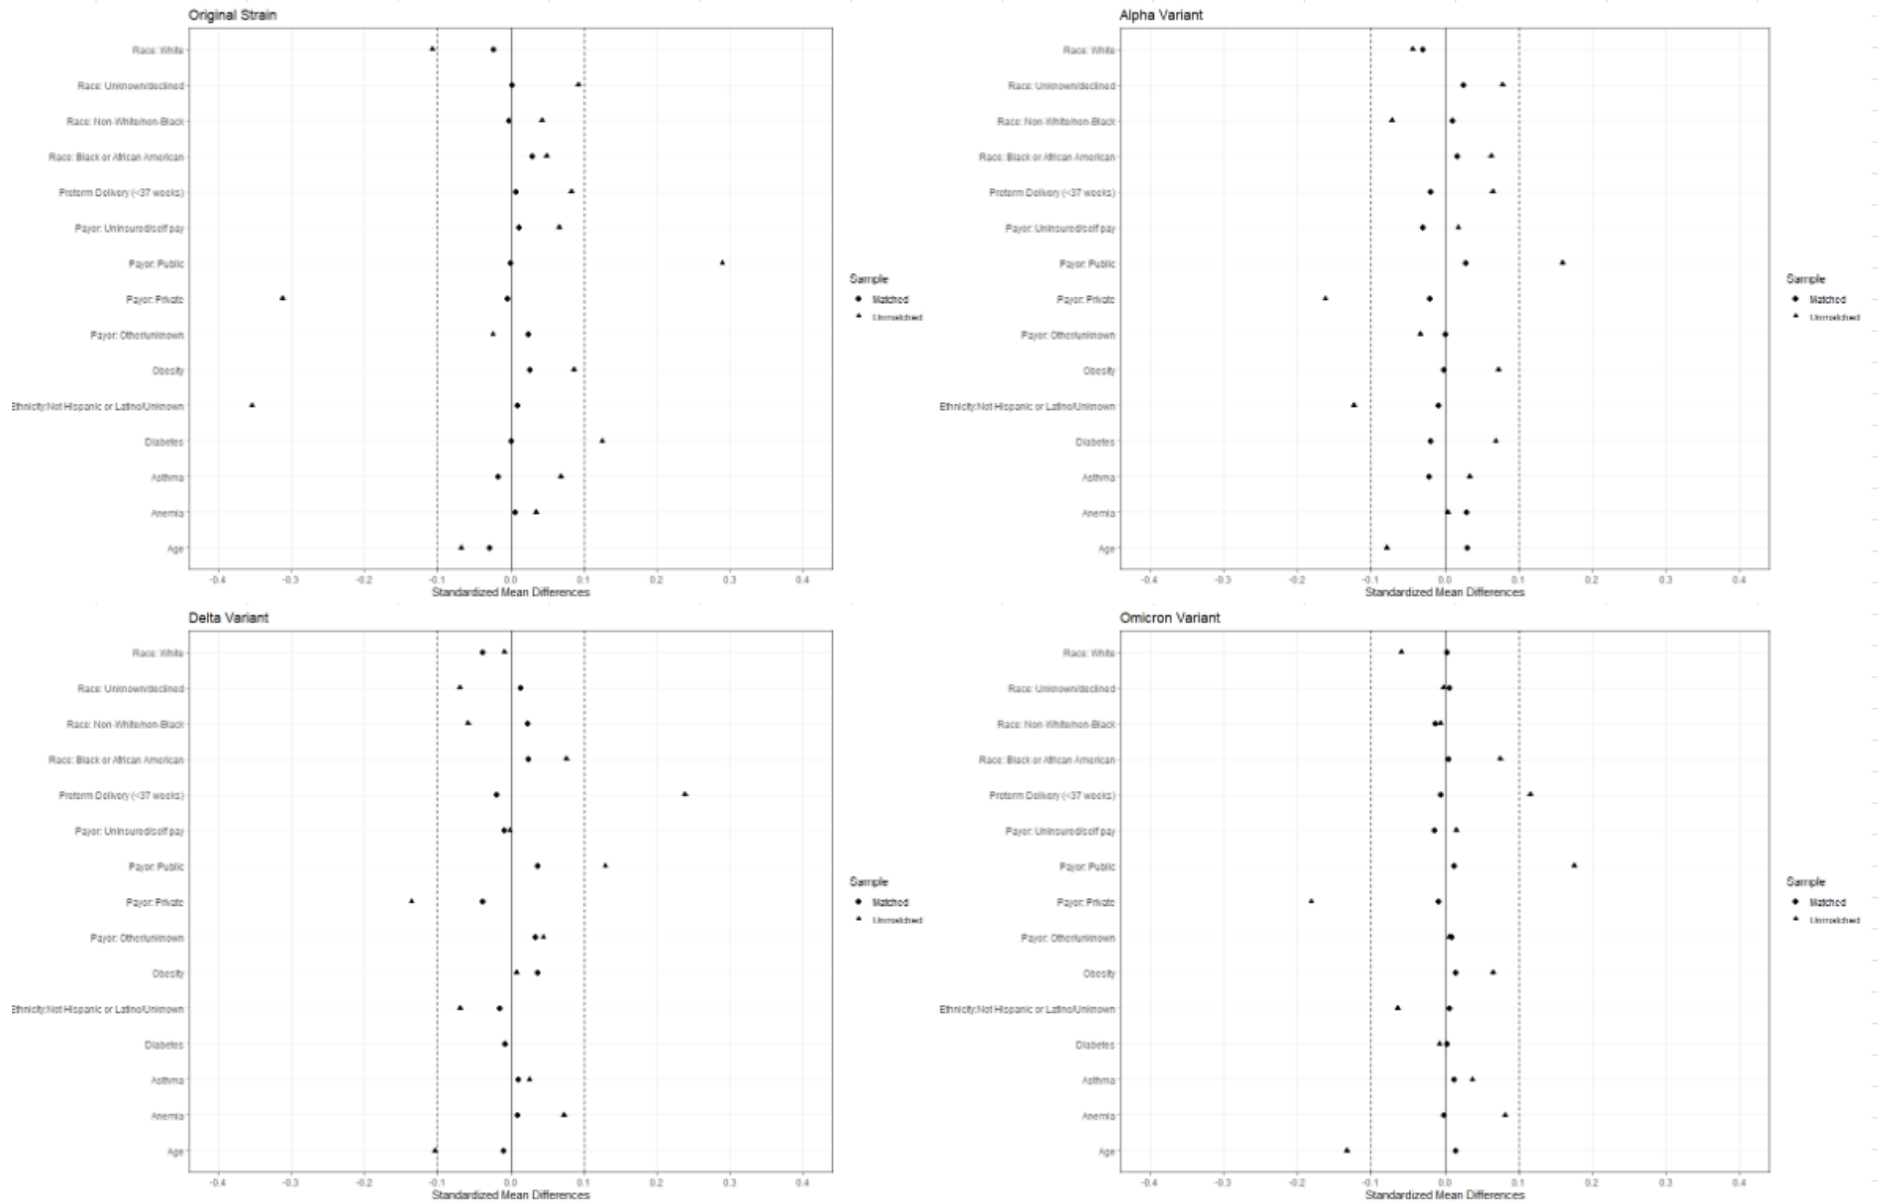

eTable 2. Distribution of Individual SMM, by Variant

| Complication (as defined by US CDC)              | Original Strain                    |                          | Alpha Variant                      |                          | Delta Variant                      |                          | Omicron Variant                    |                          |
|--------------------------------------------------|------------------------------------|--------------------------|------------------------------------|--------------------------|------------------------------------|--------------------------|------------------------------------|--------------------------|
|                                                  | Unknown/Test-Negative<br>N = 3,906 | Test-Positive<br>N = 978 | Unknown/Test-Negative<br>N = 2,974 | Test-Positive<br>N = 744 | Unknown/Test-Negative<br>N = 2,724 | Test-Positive<br>N = 681 | Unknown/Test-Negative<br>N = 2,900 | Test-Positive<br>N = 726 |
| Acute myocardial infarction                      | 0 (0%)                             | 0 (0%)                   | 1 (<0.1%)                          | 1 (0.1%)                 | 0 (0%)                             | 0 (0%)                   | 0 (0%)                             | 0 (0%)                   |
| Aneurysm                                         | 0 (0%)                             | 0 (0%)                   | 0 (0%)                             | 0 (0%)                   | 0 (0%)                             | 0 (0%)                   | 0 (0%)                             | 0 (0%)                   |
| Acute renal failure                              | 1 (<0.1%)                          | 9 (0.9%)                 | 5 (0.2%)                           | 6 (0.8%)                 | 2 (<0.1%)                          | 8 (1.2%)                 | 5 (0.2%)                           | 1 (0.1%)                 |
| Acute respiratory distress syndrome              | 3 (<0.1%)                          | 18 (1.8%)                | 4 (0.1%)                           | 19 (2.6%)                | 4 (0.1%)                           | 44 (6.5%)                | 2 (<0.1%)                          | 7 (1.0%)                 |
| Amniotic fluid embolism                          | 0 (0%)                             | 0 (0%)                   | 0 (0%)                             | 1 (0.1%)                 | 0 (0%)                             | 0 (0%)                   | 1 (<0.1%)                          | 0 (0%)                   |
| Cardiac arrest/ventricular fibrillation          | 0 (0%)                             | 0 (0%)                   | 0 (0%)                             | 1 (0.1%)                 | 0 (0%)                             | 2 (0.3%)                 | 0 (0%)                             | 0 (0%)                   |
| Conversion of cardiac rhythm                     | 0 (0%)                             | 0 (0%)                   | 0 (0%)                             | 1 (0.1%)                 | 0 (0%)                             | 0 (0%)                   | 1 (<0.1%)                          | 0 (0%)                   |
| Disseminated intravascular coagulation           | 4 (0.1%)                           | 2 (0.2%)                 | 3 (0.1%)                           | 1 (0.1%)                 | 4 (0.1%)                           | 9 (1.3%)                 | 6 (0.2%)                           | 3 (0.4%)                 |
| Eclampsia                                        | 5 (0.1%)                           | 2 (0.2%)                 | 5 (0.2%)                           | 0 (0%)                   | 2 (<0.1%)                          | 0 (0%)                   | 1 (<0.1%)                          | 2 (0.3%)                 |
| Heart failure/arrest during surgery or procedure | 0 (0%)                             | 0 (0%)                   | 0 (0%)                             | 0 (0%)                   | 0 (0%)                             | 0 (0%)                   | 0 (0%)                             | 0 (0%)                   |
| Purpurful cerebrovascular disorders              | 1 (<0.1%)                          | 3 (0.3%)                 | 2 (<0.1%)                          | 0 (0%)                   | 0 (0%)                             | 4 (0.6%)                 | 1 (<0.1%)                          | 0 (0%)                   |
| Pulmonary edema or acute heart failure           | 2 (<0.1%)                          | 1 (0.1%)                 | 5 (0.2%)                           | 3 (0.4%)                 | 1 (<0.1%)                          | 1 (0.1%)                 | 3 (0.1%)                           | 0 (0%)                   |
| Severe anesthesia complications                  | 0 (0%)                             | 0 (0%)                   | 0 (0%)                             | 0 (0%)                   | 0 (0%)                             | 0 (0%)                   | 0 (0%)                             | 0 (0%)                   |
| Sepsis                                           | 5 (0.1%)                           | 11 (1.1%)                | 1 (<0.1%)                          | 6 (0.8%)                 | 4 (0.1%)                           | 7 (1.0%)                 | 2 (<0.1%)                          | 2 (0.3%)                 |
| Shock                                            | 5 (0.1%)                           | 3 (0.3%)                 | 2 (<0.1%)                          | 2 (0.3%)                 | 1 (<0.1%)                          | 6 (0.9%)                 | 0 (0%)                             | 1 (0.1%)                 |
| Sickle cell disease with crisis                  | 2 (<0.1%)                          | 0 (0%)                   | 0 (0%)                             | 0 (0%)                   | 0 (0%)                             | 0 (0%)                   | 0 (0%)                             | 0 (0%)                   |
| Air and thrombotic embolism                      | 0 (0%)                             | 1 (0.1%)                 | 0 (0%)                             | 0 (0%)                   | 0 (0%)                             | 1 (0.1%)                 | 0 (0%)                             | 0 (0%)                   |
| Blood products transfusion                       | 40 (1.0%)                          | 15 (1.5%)                | 36 (1.2%)                          | 12 (1.6%)                | 29 (1.1%)                          | 25 (3.7%)                | 36 (1.2%)                          | 12 (1.7%)                |
| Hysterectomy                                     | 8 (0.2%)                           | 1 (0.1%)                 | 2 (<0.1%)                          | 3 (0.4%)                 | 2 (<0.1%)                          | 0 (0%)                   | 2 (<0.1%)                          | 0 (0%)                   |
| Temporary tracheostomy                           | 0 (0%)                             | 1 (0.1%)                 | 0 (0%)                             | 0 (0%)                   | 0 (0%)                             | 2 (0.3%)                 | 0 (0%)                             | 1 (0.1%)                 |
| Ventilation                                      | 4 (0.1%)                           | 7 (0.7%)                 | 3 (0.1%)                           | 4 (0.5%)                 | 2 (<0.1%)                          | 15 (2.2%)                | 3 (0.1%)                           | 3 (0.4%)                 |
| Any severe maternal morbidity event              | 66 (1.7%)                          | 44 (4.5%)                | 55 (1.8%)                          | 35 (4.7%)                | 40 (1.5%)                          | 70 (10%)                 | 53 (1.8%)                          | 21 (2.9%)                |
| Any respiratory maternal morbidity event         | 6 (0.2%)                           | 18 (1.8%)                | 5 (0.2%)                           | 19 (2.6%)                | 5 (0.2%)                           | 46 (6.8%)                | 4 (0.1%)                           | 7 (1.0%)                 |
| Any non-respiratory material morbidity event     | 64 (1.6%)                          | 34 (3.5%)                | 54 (1.8%)                          | 26 (3.5%)                | 38 (1.4%)                          | 42 (6.2%)                | 53 (1.8%)                          | 16 (2.2%)                |
| Any non-transfusion maternal morbidity event     | 32 (0.8%)                          | 33 (3.4%)                | 22 (0.7%)                          | 28 (3.8%)                | 17 (0.6%)                          | 58 (8.5%)                | 18 (0.6%)                          | 13 (1.8%)                |

**eTable 3.** Baseline Characteristics Comparing Populations With Documented SARS-CoV-2 Testing After Propensity Matching

| Characteristic                                       | Original Strain          |                            | Alpha Variant            |                            | Delta Variant            |                            | Omicron Variant          |                            |
|------------------------------------------------------|--------------------------|----------------------------|--------------------------|----------------------------|--------------------------|----------------------------|--------------------------|----------------------------|
|                                                      | Test-Positive<br>N = 978 | Test-Negative<br>N = 3,912 | Test-Positive<br>N = 744 | Test-Negative<br>N = 2,976 | Test-Positive<br>N = 678 | Test-Negative<br>N = 2,712 | Test-Positive<br>N = 724 | Test-Negative<br>N = 2,434 |
| <b>Age</b>                                           | 29.5 (24.8, 33.5)        | 29.2 (24.7, 33.4)          | 29.0 (24.4, 33.5)        | 29.1 (24.6, 33.5)          | 29.1 (25.0, 33.1)        | 29.2 (24.9, 33.1)          | 28.6 (24.6, 32.8)        | 29.8 (25.2, 33.9)          |
| <b>Race</b>                                          |                          |                            |                          |                            |                          |                            |                          |                            |
| White                                                | 618 (63%)                | 2,517 (64%)                | 499 (67%)                | 2,018 (68%)                | 458 (68%)                | 1,834 (68%)                | 466 (64%)                | 1,586 (65%)                |
| Black or African American                            | 209 (21%)                | 800 (20%)                  | 155 (21%)                | 621 (21%)                  | 142 (21%)                | 564 (21%)                  | 153 (21%)                | 490 (20%)                  |
| Other*                                               | 111 (11%)                | 445 (11%)                  | 62 (8.3%)                | 230 (7.7%)                 | 66 (9.7%)                | 253 (9.3%)                 | 84 (12%)                 | 292 (12%)                  |
| Unknown/declined                                     | 40 (4.1%)                | 150 (3.8%)                 | 28 (3.8%)                | 107 (3.6%)                 | 12 (1.8%)                | 61 (2.2%)                  | 21 (2.9%)                | 66 (2.7%)                  |
| <b>Ethnicity</b>                                     |                          |                            |                          |                            |                          |                            |                          |                            |
| Hispanic or Latino                                   | 323 (33%)                | 1,320 (34%)                | 156 (21%)                | 625 (21%)                  | 139 (21%)                | 553 (20%)                  | 160 (22%)                | 648 (27%)                  |
| Not Hispanic or Latino/unknown                       | 655 (67%)                | 2,592 (66%)                | 588 (79%)                | 2,351 (79%)                | 539 (79%)                | 2,159 (80%)                | 564 (78%)                | 1,786 (73%)                |
| <b>Payor</b>                                         |                          |                            |                          |                            |                          |                            |                          |                            |
| Private                                              | 412 (42%)                | 1,651 (42%)                | 380 (51%)                | 1,521 (51%)                | 351 (52%)                | 1,398 (52%)                | 349 (48%)                | 1,241 (51%)                |
| Public                                               | 539 (55%)                | 2,150 (55%)                | 353 (47%)                | 1,408 (47%)                | 316 (47%)                | 1,274 (47%)                | 361 (50%)                | 1,161 (48%)                |
| Uninsured/self pay                                   | 26 (2.7%)                | 106 (2.7%)                 | 11 (1.5%)                | 47 (1.6%)                  | 11 (1.6%)                | 40 (1.5%)                  | 14 (1.9%)                | 32 (1.3%)                  |
| Other/unknown                                        | 1 (0.1%)                 | 5 (0.1%)                   | 0 (0%)                   | 0 (0%)                     | 0 (0%)                   | 0 (0%)                     | 0 (0%)                   | 0 (0%)                     |
| <b>Obesity</b>                                       | 158 (16%)                | 639 (16%)                  | 131 (18%)                | 498 (17%)                  | 90 (13%)                 | 357 (13%)                  | 98 (14%)                 | 319 (13%)                  |
| <b>Asthma</b>                                        | 72 (7.4%)                | 269 (6.9%)                 | 51 (6.9%)                | 210 (7.1%)                 | 45 (6.6%)                | 174 (6.4%)                 | 51 (7.0%)                | 184 (7.6%)                 |
| <b>Diabetes</b>                                      | 143 (15%)                | 524 (13%)                  | 95 (13%)                 | 397 (13%)                  | 71 (10%)                 | 285 (11%)                  | 74 (10%)                 | 258 (11%)                  |
| <b>Anemia</b>                                        | 96 (9.8%)                | 398 (10%)                  | 69 (9.3%)                | 289 (9.7%)                 | 86 (13%)                 | 343 (13%)                  | 94 (13%)                 | 288 (12%)                  |
| <b>Preterm Delivery less than 37 weeks gestation</b> | 137 (14%)                | 553 (14%)                  | 106 (14%)                | 450 (15%)                  | 138 (20%)                | 547 (20%)                  | 107 (15%)                | 291 (12%)                  |
| <b>Patients with Severe Maternal Morbidities</b>     | 44 (4.5%)                | 81 (2.1%)                  | 35 (4.7%)                | 59 (2.0%)                  | 70 (10%)                 | 61 (2.2%)                  | 21 (2.9%)                | 41 (1.7%)                  |

Statistics presented: n (%); Median (IQR)

\*American Indian or Alaska Native, Asian, Hispanic

**eTable 4.** Association of SARS-CoV-2 Infection With Any SMM, Nonrespiratory SMM, Respiratory SMM, and Nontransfusion SMM

|                            | Original Strain |               |                     | Alpha Variant |               |                     | Delta Variant |               |                      | Omicron Variant |               |                     |
|----------------------------|-----------------|---------------|---------------------|---------------|---------------|---------------------|---------------|---------------|----------------------|-----------------|---------------|---------------------|
|                            | Test-Positive   | Test-Negative | Odds Ratio (95% CI) | Test-Positive | Test-Negative | Odds Ratio (95% CI) | Test-Positive | Test-Negative | Odds Ratio (95% CI)  | Test-Positive   | Test-Negative | Odds Ratio (95% CI) |
| <b>Any SMM</b>             |                 |               |                     |               |               |                     |               |               |                      |                 |               |                     |
| SMM                        | 44              | 81            | 2.23 (1.52, 3.22)   | 35            | 59            | 2.44 (1.58,3.72)    | 70            | 61            | 5.0 (3.51, 7.15)     | 21              | 41            | 1.74 (1.01, 2.94)   |
| No SMM                     | 934             | 3831          |                     | 709           | 2917          |                     | 608           | 2651          |                      | 703             | 2393          |                     |
| <b>Non-Respiratory SMM</b> |                 |               |                     |               |               |                     |               |               |                      |                 |               |                     |
| SMM                        | 34              | 80            | 1.73 (1.13, 2.57)   | 26            | 57            | 1.85 (1.14, 2.94)   | 42            | 61            | 2.87 (1.91, 4.28)    | 16              | 41            | 1.31 (0.72, 2.32)   |
| No SMM                     | 944             | 3832          |                     | 718           | 2919          |                     | 636           | 2651          |                      | 708             | 2393          |                     |
| <b>Respiratory SMM</b>     |                 |               |                     |               |               |                     |               |               |                      |                 |               |                     |
| SMM                        | 18              | 9             | 8.13 (3.73, 19.03)  | 19            | 9             | 8.64 (4.0, 20.13)   | 46            | 9             | 21.86 (11.17, 47.95) | 7               | 6             | 3.95 (1.31, 12.31)  |
| No SMM                     | 960             | 3903          |                     | 725           | 2967          |                     | 632           | 2703          |                      | 717             | 2428          |                     |
| <b>Non-Transfusion SMM</b> |                 |               |                     |               |               |                     |               |               |                      |                 |               |                     |
| SMM                        | 33              | 43            | 3.14 (1.97, 4.96)   | 28            | 33            | 3.49 (2.08, 5.80)   | 58            | 34            | 21.86 (11.17, 47.95) | 13              | 22            | 2.00 (0.97, 3.95)   |
| No SMM                     | 945             | 3869          |                     | 716           | 2943          |                     | 620           | 2678          |                      | 711             | 2412          |                     |
